# Supplementary material
Source: Springer Nature journal article supplement (https://www.springermedizin.de/resource/supplementary/13058_2010_2744_MOESM2_ESM.pdf/9702068)

**A** MDA-MB-231**B** MCF7

Runx2

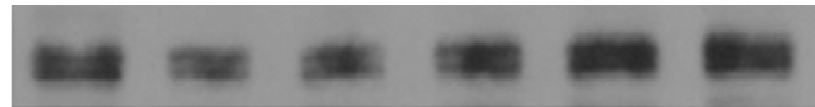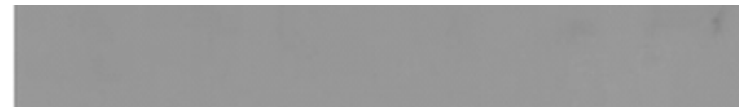

p21

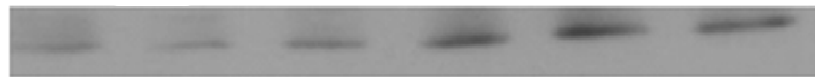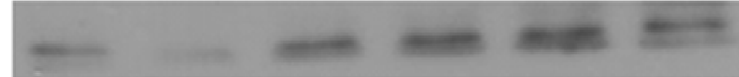

Phospho-Erk

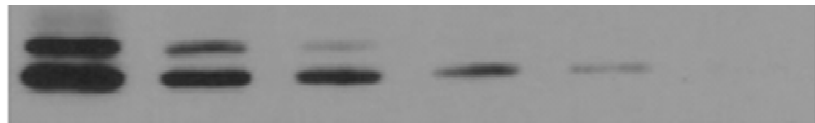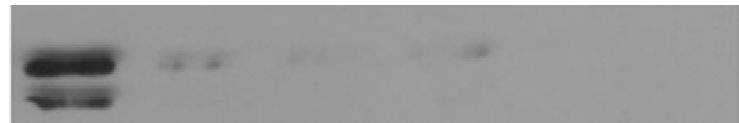

Total Erk

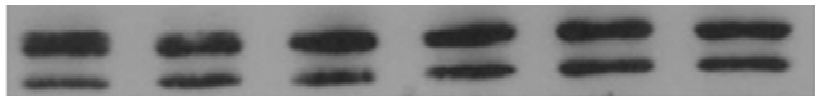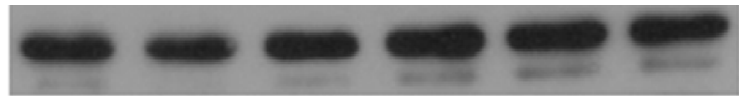

GAPDH

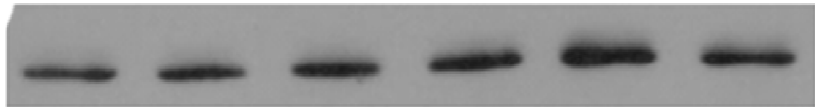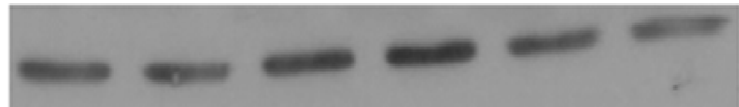

PD98059 (μM)

0 1 5 10 20 50

0 1 5 10 20 50

Supplement: MOESM2 [file 9702068]
